# Supplementary material
Source: publisher figshare collection journal article supplement (https://sage.figshare.com/ndownloader/files/23881953)
Supplement: Supplementary file 1 [file 23881953]

## Supplemental File: Qualitative Interview Instrument

1. Why did you decide to become a prosecutor? Where do you see your career going from here?

---

---

---

### SECTION 1: Goals and Priorities for the Office

2. In your own words, what do you see as the current priorities in your office?

---

---

---

Probes:

- a) How are these priorities communicated to you and your colleagues?
- b) To what extent are priorities set by administration, and to what extent are they set by individual prosecutors or units?
- c) Do you understand the priorities?
- d) Do the priorities reflect your priorities?

---

---

---

3. In your view, have there been any changes in terms of how the office views its mission since the new administration took over?

---

---

---

Probe:

If supervisor, how do you communicate priorities set by management to your staff?

---

---

4. What criteria would you use to assess the overall success of your office?

---

---

---

5. What changes do you think would increase your office's overall success? (This can be anything including training, new guidelines, caseload management, technology upgrades, new diversion programs, etc.)

---

---

---

## SECTION 2: Perceptions of What Constitutes a Good Prosecutor

6. How do you judge your own success as a prosecutor?

---

---

---

Probe:

How does the office evaluate your success as a prosecutor?

---

---

---

7. To what extent is your view about what makes a good prosecutor shared by other line prosecutors in your office?

---

---

---

8. What changes do you think would increase your own ability to be more effective as a prosecutor?

---

---

---

---

## SECTION 3: Suggestions for Reform (Office-wide)

9. What do you see as some areas of reform necessary to promote the mission of your office?

---

---

---

10. Do you think your office seeks jail/prison sentences more or less often than it should?

---

---

---

11. In what ways can working with community groups help improve the work of your office?

---

---

---

12. Are there specific changes in existing law that you think should be made to increase or reduce the use of incarceration?

---

---

---

13. Are there data reports that you wish you could have on specific things that would help you to be more efficient and fairer in your job?

Probe:

When was the last time you thought to yourself, “I wish I had [this] data or [this] piece of information?”

---

---

---

14. What is your view of racial/ethnic disparities in the CJ system?
- Can you describe them and why do you think they exist?
  - What efforts is your office making, if any, to reduce racial and ethnic disparities in the justice system?
  - Are there specific changes in the existing law or office policies that you think should be made to reduce these disparities?
  - Is there anything you think lawmakers can do to reduce these disparities?

---

---

---

---

#### SECTION 4: Suggestions of What to Measure with Performance Indicators

*As you may know, we are developing indicators to measure the performance of prosecutors’ offices over time. We wanted to get a sense of what you think should be measured under the following broad categories.*

15. **Community safety and wellbeing** – what are some specific ways we can think about and measure “community safety and wellbeing” as it pertains to your office’s work? (e.g., successful completion of diversion programs)

---

---

---

16. **Capacity & Efficiency** – what are some specific ways we can think about and measure “capacity & efficiency” as it pertains to your office’s work? (e.g., timeliness of case processing)

---

---

---

17. **Fairness & Impartiality** – what are some specific ways we can think about and measure “fairness/impartiality” as it pertains to your office’s work? (e.g., differences in custodial sentences for similar offenders)

---

---

---

---

SECTION 5: Prosecutorial Characteristics

18. **Race** – what is your race (let them self-identify)?

Black      White      Asian      *Other* \_\_\_\_\_

19. **Ethnicity** – what is your ethnicity (let them self-identify)?

Hispanic      Non-Hispanic      *Other* \_\_\_\_\_

20. **Age** – what year were you born?

*Include number* \_\_\_\_\_

21. **Unit identity** – in what unit/division/bureau of your office are you currently assigned?

\_\_\_\_\_

22. **Experience level as a prosecutor** – how many years of prosecutorial experience do you have?

*Include number* \_\_\_\_\_

23. **Experience level as an attorney** – how many years of overall experience do you have as an attorney?

*Include number* \_\_\_\_\_

24. **Prior experience as a defense attorney** – have you ever worked as a defense attorney?

YES      NO

25. **Prior experience as a law enforcement officer**– have you ever worked as a law enforcement officer?

YES      NO

26. **Caseload** – how many open criminal cases do you currently have?

*Include number* \_\_\_\_\_
